# Supplementary material for: Efficacy and Safety of Topical Nitric Oxide−Releasing Berdazimer Gel in Patients With Molluscum Contagiosum: A Phase 3 Randomized Clinical Trial
Source: PubMed Central journal article supplement — JAMA Dermatol. 2022 Jul 13;158(8):871–8. doi: 10.1001/jamadermatol.2022.2721 (PMC9280611; doi:10.1001/jamadermatol.2022.2721), 2022-07-13
Supplement: jamadermatol-e222721-s002.pdf [file jamadermatol-e222721-s002.pdf]

## Supplemental Online Content

Browning JC, Enloe C, Cartwright M, et al. Efficacy and safety of topical nitric oxide-releasing berdazimer gel in patients with molluscum contagiosum: a phase 3 randomized clinical trial. *JAMA Dermatol*. Published online July 13, 2022.  
doi:10.1001/jamadermatol.2022.2721

**eMethods 1** : Investigator Training for Diagnosis and Molluscum Contagiosum (MC) Lesion Counts

**eMethods 2** : Analyses of Secondary End Points

**eTable 1.** Local Skin Reaction Score

This supplemental material has been provided by the authors to give readers additional information about their work.

### **eMethods 1: Investigator training for diagnosis and molluscum contagiosum (MC) lesion counts**

Principal investigators, including pediatricians and dermatologists, diagnosed MC clinically, based on observation of the characteristic skin-colored pearly papules with or without umbilication; biopsies were not conducted. All participating investigators and evaluators received formal training in lesion recognition by inspection (ie, with/without magnification and palpation) and systematic lesion counting. Only treatable lesions, defined as active (raised, palpable) MC lesions that were at least 2 cm away from the ocular region, were counted. If agminated (clustered) lesions could not clearly be differentiated, then this was counted as 1 lesion. Investigators/evaluators were consistent with the method of counting lesions throughout the study.

Investigator training included differential diagnosis and recognition of residual post-resolution skin findings such as erythema, hyper- or hypopigmentation, and pitted scarring (indentation). All study personnel who performed lesion counts were required to pass an online training examination.

## **eMethods 2: Analyses of secondary endpoints**

If the primary endpoint was statistically significant at  $\alpha = .05$ , then secondary efficacy endpoints were tested in the following hierarchical fixed-sequence: 1) percentage of patients achieving an MC lesion count of 0 or 1 at Week 12 using nonresponder imputation (NRI); 2) percentage of patients achieving  $\geq 90\%$  reduction from baseline in the number of MC lesions at Week 12 using NRI; 3) percentage of patients with complete clearance of all MC lesions at Week 8; 4) percent change from baseline in the number of all treatable MC lesions at Week 4. NRI was used for missing week-12 lesion counts, and missing week-8 lesion counts were imputed using the monotone regression method based on previous lesion count assessments, treatment, investigator type (dermatologist vs other), household number of randomized patients (1 vs 2), baseline beginning-of-the-end (BOTE) score (0 vs  $\geq 1$ ), age, and baseline lesion count. A mixed model for repeated measures (MMRM) was used to analyze percent change from baseline in the number of treatable MC lesions at week 4. The model included treatment, visit, treatment-by-visit interaction, investigator type (dermatologist vs other), household number of randomized subjects (1 vs 2), baseline BOTE score (0 vs  $\geq 1$ ), age, and baseline lesion count as factors with an unstructured covariance matrix.

**eTable 1. Local Skin Reaction Score**

|          | <b>Erythema</b>                      | <b>Flaking/<br/>Scaling</b>              | <b>Crusting</b>                           | <b>Swelling</b>                                  | <b>Vesiculation/<br/>Pustulation</b> | <b>Erosion/<br/>Ulceration</b> |
|----------|--------------------------------------|------------------------------------------|-------------------------------------------|--------------------------------------------------|--------------------------------------|--------------------------------|
| <b>0</b> | Not present                          | Not present                              | Not present                               | Not present                                      | Not present                          | Not present                    |
| <b>1</b> | Slightly pink                        | Mild, limited                            | Isolated crusting                         | Minimal, limited                                 | Fine vesicles                        | Superficial erosion            |
| <b>2</b> | Pink or light red                    | Moderate                                 | Crusting <50%                             | Mild, palpable                                   | Scant transudate or exudate          | Moderate erosion               |
| <b>3</b> | Red, restricted to treatment area    | Coarse                                   | Crusting >50%                             | Moderate                                         | Moderate transudate or exudate       | Marked, extensive              |
| <b>4</b> | Red extending outside treatment area | Scaling extending outside treatment area | Crusting extending outside treatment area | Marked swelling extending outside treatment area | Marked transudate or exudate         | Black eschar or ulceration     |
