# Supplementary material for: Efficacy and Safety of Topical Nitric Oxide−Releasing Berdazimer Gel in Patients With Molluscum Contagiosum: A Phase 3 Randomized Clinical Trial
Source: PubMed Central journal article supplement — JAMA Dermatol. 2022 Jul 13;158(8):871–8. doi: 10.1001/jamadermatol.2022.2721 (PMC9280611; doi:10.1001/jamadermatol.2022.2721), 2022-07-13
Supplement: jamadermatol-e222721-s003.pdf [file jamadermatol-e222721-s003.pdf]

## Data Sharing Statement

Browning. Efficacy and Safety of Topical Nitric Oxide-Releasing Berdazimer Gel in Patients With Molluscum Contagiosum. *JAMA Dermatol*. Published July 13, 2022.  
doi:10.1001/jamadermatol.2022.2721

### Data

**Data available:** No
